# Supplementary material for: A pathogenic tau fragment compromises microtubules, disrupts insulin signaling and induces the unfolded protein response
Source: Springer Nature journal article supplement (doi:10.1186/s40478-018-0651-9), 2019-01-03
Supplement: MOESM1 [file 25666624]

**Additional file 1: Table S1.** Antibodies used for western blots and immunohistochemistry

| <b>Primary Antibodies</b>   |                                                                                    |           |            |                           |
|-----------------------------|------------------------------------------------------------------------------------|-----------|------------|---------------------------|
| <b>Antibody</b>             | <b>Antigen/Epitope</b>                                                             | <b>WB</b> | <b>ICC</b> | <b>Source</b>             |
| K9JA                        | C-terminal half of tau                                                             | 1/10,000  | 1/1,000    | DAKO                      |
| PHF1                        | Tau phosphorylated at S396/S404                                                    | 1/5,000   | -          | Professor P. Davies [1]   |
| AT8                         | Tau phosphorylated at S202/T205                                                    | 1/3,000   | -          | Thermo Fisher Scientific  |
| AT180                       | Tau phosphorylated at T231                                                         | 1/500     | -          | Innogenetics              |
| AC15                        | $\beta$ -Actin                                                                     | 1/10,000  | -          | Abcam                     |
| Actin                       | $\beta$ -Actin (Ab8227)                                                            | 1/10,000  | -          | Abcam                     |
| DM1A                        | $\alpha$ -Tubulin                                                                  | 1/1,000   | 1/1,000    | Sigma                     |
| Acetylated tubulin          | Tubulin acetylated at Lys40                                                        | 1/2,000   | 1/200      | Santa Cruz Biotechnology  |
| $\alpha$ -Tubulin           | $\alpha$ -Tubulin                                                                  | 1/1,000   | 1/200      | Abcam                     |
| $\alpha$ TAT1               | $\alpha$ -Tubulin N-acetyltransferase 1 (MEC-17)                                   | 1/500     | -          | Abcam                     |
| GSK3                        | Glycogen synthase kinase3 $\alpha$ / $\beta$ (GSK3 $\alpha$ / $\beta$ )            | 1/1,000   | -          | Santa Cruz Biotechnology  |
| Phospho-GSK3                | GSK3 $\alpha$ / $\beta$ phosphorylated at Ser21/Ser9                               | 1/500     | -          | Cell Signaling Technology |
| Akt                         | Akt                                                                                | 1/1,000   | -          | Cell Signaling Technology |
| Phospho-Akt                 | Akt phosphorylated at Ser473                                                       | 1/1,000   | -          | Cell Signaling Technology |
| PERK                        | PRKR-like endoplasmic reticulum kinase                                             | 1/1,000   | -          | Cell Signaling Technology |
| Phospho-PERK                | PERK phosphorylated at Thr980                                                      | 1/1,000   | -          | Cell Signaling Technology |
| eIF2 $\alpha$               | Eukaryotic Initiation factor 2 $\alpha$                                            | 1/500     | -          | Cell Signaling Technology |
| Phospho-eIF2 $\alpha$       | EIF2 $\alpha$ phosphorylated at Ser51                                              | 1/500     | -          | Cell Signaling Technology |
| ATF6 $\alpha$               | Amino acids 1-273 of human activating transcription factor 6                       | 1/500     | -          | Novus Biologicals         |
| IRE1 $\alpha$               | Inositol-requiring enzyme 1 $\alpha$                                               | 1/1,000   | -          | Cell Signaling Technology |
| Phospho-IRE1 $\alpha$       | IRE1 $\alpha$ phosphorylated at S724                                               | 1/1,000   | -          | Novus Biologicals         |
| CHOP                        | Amino acids 1-168 of full length CCAAT-enhancer-binding protein homologous protein | 1/200     | -          | Santa Cruz Biotechnology  |
| GAPDH                       | Glyceraldehyde 3-phosphate dehydrogenase                                           | 1/2,000   | -          | Santa Cruz Biotechnology  |
| <b>Secondary Antibodies</b> |                                                                                    |           |            |                           |
| <b>Antibody</b>             | <b>Species Reactivity</b>                                                          | <b>WB</b> | <b>ICC</b> | <b>Source</b>             |
| AlexaFluor 680              | Anti-mouse IgG                                                                     | 1/10,000  | -          | Life Technologies         |
| IRDye 800                   | Anti-rabbit IgG                                                                    | 1/10,000  | -          | Rockland Inc              |
| AlexaFluor 488              | Anti-rabbit IgG                                                                    | -         | 1/500      | Life Technologies         |
| AlexaFluor 568              | Anti-mouse IgG                                                                     | -         | 1/500      | Life Technologies         |

ICC = immunocytochemistry; IgG = immunoglobulin G; WB = western blot

## Reference

- Greenberg SG, Davies P, Schein JD, Binder LI (1992) Hydrofluoric acid-treated tau PHF proteins display the same biochemical properties as normal tau. *J Biol Chem* 267: 564-569
