# Supplementary material for: A pathogenic tau fragment compromises microtubules, disrupts insulin signaling and induces the unfolded protein response
Source: Springer Nature journal article supplement (doi:10.1186/s40478-018-0651-9), 2019-01-03

**Additional file 2: Figure S1**

Expression of tau in paraformaldehyde-fixed CHO-FL and CHO-Tau35 cells

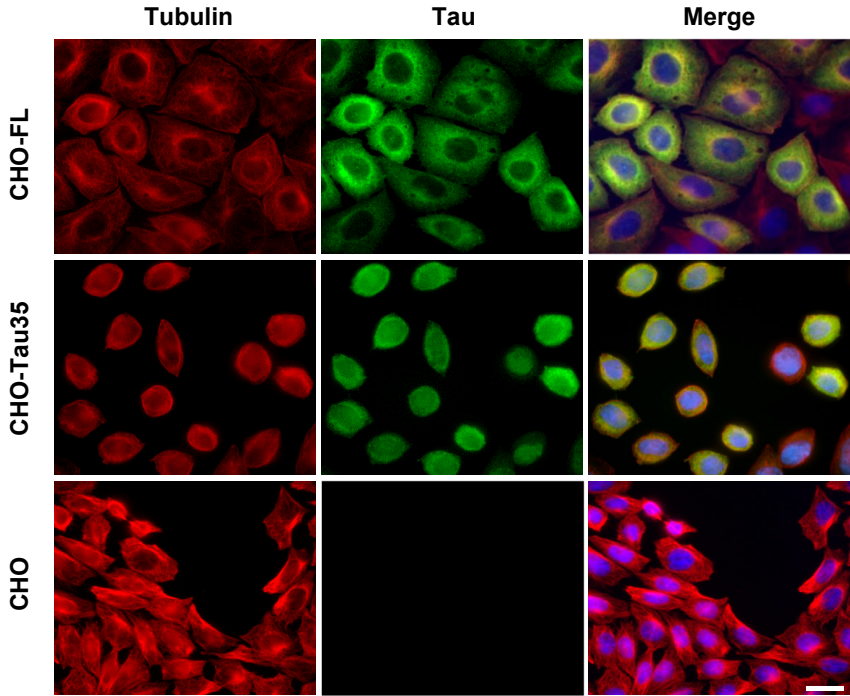

**Additional file 2: Figure S2**

Validation of exogenous expression of  $\alpha$ TAT1

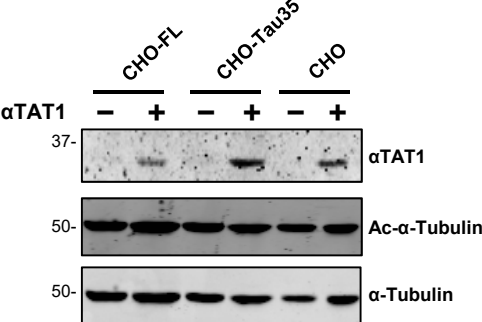

**Additional file 2: Figure S3**

LiCl treatment reduced phosphorylation of Tau35

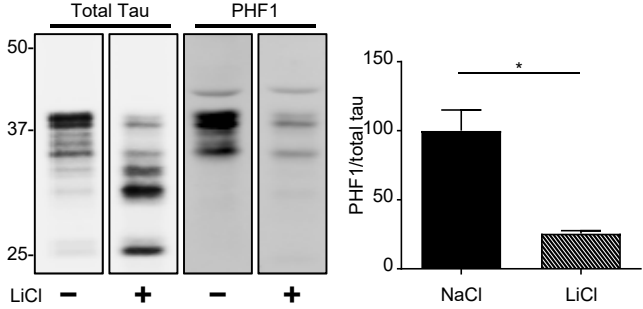

**Additional file 2: Figure S4**

Thapsigargin-induced UPR activation in CHO-FL, CHO-Tau35 and CHO cells

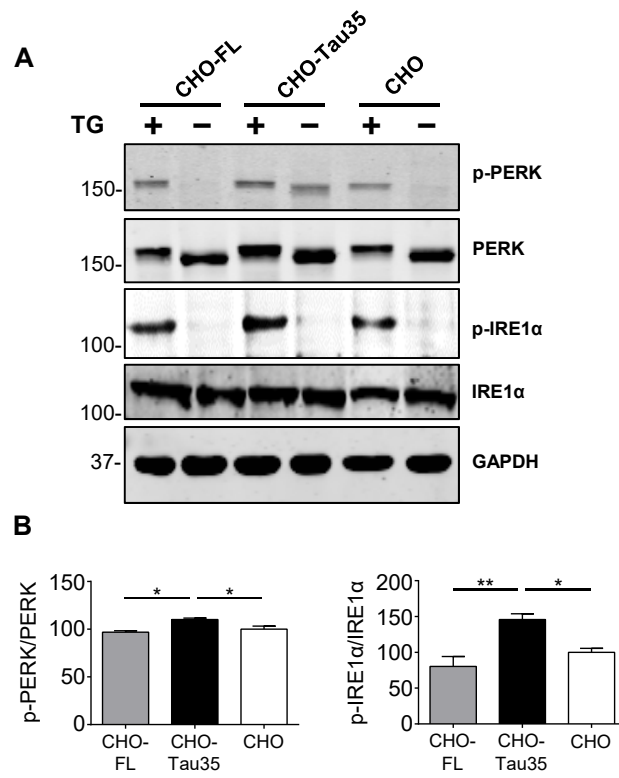

Supplement: MOESM2 [file 25666624]
